# Supplementary material for: Utilisation of dental services by Brazilian adults in rural and urban areas: a multi-group structural equation analysis using the Andersen behavioural model
Source: BMC Public Health. 2020 Jun 17;20:953. doi: 10.1186/s12889-020-09100-x (PMC7301519; doi:10.1186/s12889-020-09100-x)
Supplement: Supplementary file 2 — Additional file 2. Direct, indirect and total standardised effects on the structural equation model for the interval since the last dental visit outcome in rural and urban contexts. [file 12889_2020_9100_MOESM2_ESM.docx]

Additional file 2. Direct, indirect and total standardised effects on the structural equation model for the interval since the last dental visit outcome in rural and urban contexts.

| **Parameter** | **Rural** | | **Urban** | | **Total sample** | |
| --- | --- | --- | --- | --- | --- | --- |
| **β** | **Bias-corrected**  **95% CI** | **β** | **Bias-corrected**  **95% CI** | **β** | **Bias-corrected**  **95% CI** |
| **Direct effects** |  |  |  |  |  |  |
| Need → interval since last dental visit | 0.41 | 0.39 to 0.43 ** | 0.82 | 0.58 to 1.33 ** | 0.82 | 0.61 to 1.19 ** |
| Social network → interval since last dental visit | - | - | -2.59 | -4.74 to -1.66 ** | -2.53 | -3.65 to -1.86 ** |
| Social network → need | - | - | 0.95 | 0.50 to 1.57 ** | 0.85 | 0.50 to 1.23 ** |
| Social network → enabling financing | 2.40 | 1.64 to 4.16 ** | 1.20 | 1.13 to 1.27 ** | 1.23 | 1.21 to 1.36 ** |
| Social network → enabling organisation | 1.92 | 1.34 to 3.29 ** | 0.88 | 0.83 to 0.94 ** | 1.00 | 0.94 to 1.07 ** |
| Social network → registration in primary care | -0.47 | -0.85 to -0.29 ** | -0.31 | -0.33 to -0.28 ** | -0.36 | -0.39 to -0.34 ** |
| Enabling financing → interval since last dental visit | -0.21 | -0.23 to -0.19 ** | 1.54 | 0.89 to 3.26 ** | 1.25 | 0.81 to 2.00 ** |
| Enabling financing → need | -0.11 | -0.14 to -0.08 ** | -0.82 | -1.32 to -0.53 ** | -0.68 | -0.91 to -0.48 ** |
| Enabling organisation → interval since last dental visit | - | - | 0.16 | 0.11 to 0.23 ** | 0.21 | 0.16 to 0.29 ** |
| Enabling organisation → need | -0.03 | -0.05 to -0.01 ** | -0.09 | -0.12 to -0.06 ** | -0.10 | -0.13 to -0.07 ** |
| Registration in primary care → interval since last dental visit | -0.07 | -0.09 to -0.05 ** | -0.11 | -0.13 to -0.08 ** | -0.12 | -0.15 to -0.10 ** |
| Registration in primary care → need | 0.02 | 0.01 to 0.04 ** | 0.05 | 0.04 to 0.06 ** | 0.05 | 0.04 to 0.06 ** |
| Education → interval since last dental visit | - | - | 0.65 | 0.38 to 1.18 ** | 0.72 | 0.49 to 1.08 ** |
| Education → need | -0.08 | -0.11 to -0.06 ** | -0.36 | -0.51 to -0.27 ** | -0.37 | -0.48 to -0.28 ** |
| Education → social network | 0.48 | 0.41 to 0.54 ** | 0.70 | 0.68 to 0.72 ** | 0.69 | 0.67 to 0.71 ** |
| Education → enabling financing | -0.61 | -1.54 to -0.22 ** | -0.17 | -0.23 to -0.09 ** | -0.19 | -0.26 to -0.12 ** |
| Education → enabling organisation | -0.66 | -1.28 to -0.36 ** | -0.18 | -0.24 to -0.13 ** | -0.24 | -0.31 to -0.19 ** |
| Education → registration in primary care | 0.20 | 0.11 to 0.38 ** | 0.03 | 0.01 to 0.05 * | 0.06 | 0.03 to 0.09 ** |
| Sex → interval since last dental visit | -0.12 | -0.14 to -0.10 ** | -1.00 | -1.75 to -0.67 ** | -1.13 | -1.61 to -0.85 ** |
| Sex → need | 0.12 | 0.10 to 0.13 ** | 0.37 | 0.22 to 0.59 ** | 0.40 | 0.26 to 0.56 ** |
| Sex → social network | -0.59 | -0.63 to -0.54 ** | -0.39 | -0.41 to -0.37 ** | -0.43 | -0.45 to -0.41 ** |
| Sex → enabling financing | 1.40 | 0.92 to 2.45 ** | 0.38 | 0.33 to 0.43 ** | 0.48 | 0.43 to 0.54 ** |
| Sex → enabling organisation | 1.11 | 0.75 to 1.90 ** | 0.34 | 0.30 to 0.37 ** | 0.42 | 0.39 to 0.47 ** |
| Sex → registration in primary care | -0.24 | -0.47 to -0.13 ** | -0.08 | -0.10 to -0.07 ** | -0.12 | -0.14 to -0.10 ** |
| Age → interval since last dental visit | - | - | -1.05 | -2.05 to -0.61 ** | -1.11 | -1.71 to -0.75 ** |
| Age → need | 0.81 | 0.79 to 0.84 ** | 1.00 | 0.88 to 1.20 ** | 1.01 | 0.90 to 1.13 ** |
| Age → social network | -0.43 | -0.51 to -0.36 ** | -0.06 | -0.09 to -0.02 ** | -0.12 | -0.16 to -0.09 ** |
| Age → enabling financing | 1.32 | 0.90 to 2.27 ** | 0.37 | 0.33 to 0.42 ** | 0.45 | 0.41 to 0.50 ** |
| Age → enabling organisation | 0.99 | 0.69 to 1.72 ** | 0.28 | 0.25 to 0.31 ** | 0.35 | 0.32 to 0.40 ** |
| Age → registration in primary care | -0.20 | -0.41 to -0.11 ** | -0.06 | -0.08 to -0.05 ** | -0.09 | -0.11 to -0.08 ** |
| **Indirect effects** |  |  |  |  |  |  |
| Social network → interval since last dental visit | -0.62 | -1.07 to -0.42 ** | 1.92 | 1.06 to 4.06 ** | 1.75 | 1.12 to 2.81 ** |
| Social network → need | -0.34 | -0.56 to -0.22 ** | -1.07 | -1.74 to -0.70 ** | -0.99 | -1.35 to -0.69 ** |
| Enabling financing → interval since last dental visit | -0.05 | -0.06 to -0.03 ** | -0.67 | -1.78 to -0.32 ** | -0.55 | -1.04 to -0.29 ** |
| Enabling organisation → interval since last dental visit | -0.01 | -0.02 to 0.00 ** | -0.07 | -0.14 to -0.04 ** | -0.08 | -0.15 to -0.05 ** |
| Registration in primary care → interval since last dental visit | 0.01 | 0.00 to 0.02 ** | 0.04 | 0.02 to 0.07 ** | 0.04 | 0.03 to 0.07 ** |
| Education → interval since last dental visit | -0.17 | -0.19 to -0.16 ** | -0.93 | -1.45 to -0.66 ** | -1.01 | -1.37 to -0.79 ** |
| Education → need | -0.07 | -0.08 to -0.05 ** | 0.06 | -0.04 to 0.21 n.s. | 0.07 | -0.03 to 0.17 n.s. |
| Education → enabling financing | 1.14 | 0.76 to 2.06 ** | 0.84 | 0.77 to 0.91 ** | 0.88 | 0.82 to 0.95 ** |
| Education → enabling organisation | 0.91 | 0.62 to 1.54 ** | 0.62 | 0.57 to 0.67 ** | 0.69 | 0.64 to 0.75 ** |
| Education → registration in primary care | -0.23 | -0.40 to -0.13 ** | -0.21 | -0.24 to -0.19 ** | -0.25 | -0.28 to -0.23 ** |
| Sex → interval since last dental visit | 0.05 | 0.04 to 0.06 ** | 0.93 | 0.60 to 1.68 ** | 1.06 | 0.78 to 1.54 ** |
| Sex → need | 0.00 | 0.00 to 0.01 n.s. | -0.29 | -0.52 to -0.15 ** | -0.32 | -0.47 to -0.18 ** |
| Sex → enabling financing | -1.41 | -2.49 to -0.94 ** | -0.47 | -0.52 to -0.42 ** | -0.55 | -0.61 to -0.50 ** |
| Sex → enabling organisation | -1.13 | -1.90 to -0.76 ** | -0.34 | -0.38 to -0.31 ** | -0.43 | -0.47 to -0.39 ** |
| Sex → registration in primary care | 0.28 | 0.17 to 0.52 ** | 0.12 | 0.11 to 0.13 ** | 0.16 | 0.14 to 0.17 ** |
| Age → interval since last dental visit | 0.26 | 0.24 to 0.28 ** | 1.22 | 0.78 to 2.23 ** | 1.29 | 0.92 to 1.88 ** |
| Age → need | -0.04 | -0.05 to -0.03 ** | -0.33 | -0.53 to -0.20 ** | -0.33 | -0.45 to -0.22 ** |
| Age → enabling financing | -1.04 | -2.03 to -0.63 ** | -0.07 | -0.11 to -0.03 ** | -0.16 | -0.21 to -0.11 ** |
| Age → enabling organisation | -0.83 | -1.57 to -0.53 ** | -0.05 | -0.08 to -0.02 ** | -0.12 | -0.16 to -0.09 ** |
| Age → registration in primary care | 0.20 | 0.12 to 0.42 ** | 0.02 | 0.01 to 0.03 ** | 0.05 | 0.03 to 0.06 ** |
| **Total effects** |  |  |  |  |  |  |
| Need → interval since last dental visit | 0.41 | 0.39 to 0.43 ** | 0.82 | 0.58 to 1.33 ** | 0.82 | 0.61 to 1.19 ** |
| Social network → interval since last dental visit | -0.62 | -1.07 to -0.42 ** | -0.68 | -0.76 to -0.60 ** | -0.78 | -0.90 to -0.69 ** |
| Social network → need | -0.34 | -0.56 to -0.22 ** | -0.13 | -0.18 to -0.07 ** | -0.14 | -0.19 to -0.07 ** |
| Social network → enabling financing | 2.40 | 1.64 to 4.16 ** | 1.20 | 1.13 to 1.27 ** | 1.23 | 1.21 to 1.36 ** |
| Social network → enabling organisation | 1.92 | 1.34 to 3.29 ** | 0.88 | 0.83 to 0.94 ** | 1.00 | 0.94 to 1.07 ** |
| Social network → registration in primary care | -0.47 | -0.85 to -0.29 ** | -0.31 | -0.33 to -0.28 ** | -0.36 | -0.39 to -0.33 ** |
| Enabling financing → interval since last dental visit | -0.26 | -0.28 to -0.24 ** | 0.87 | 0.51 to 1.65 ** | 0.70 | 0.44 to 1.05 ** |
| Enabling financing → need | -0.11 | -0.14 to -0.08 ** | -0.82 | -1.32 to -0.53 ** | -0.68 | -0.91 to -0.48 ** |
| Enabling organisation → interval since last dental visit | -0.01 | -0.02 to 0.00 ** | 0.09 | 0.06 to 0.13 ** | 0.13 | 0.09 to 0.18 ** |
| Enabling organisation → need | -0.03 | -0.05 to -0.01 ** | -0.09 | -0.12 to -0.06 ** | -0.10 | -0.13 to -0.07 ** |
| Registration in primary care → interval since last dental visit | -0.06 | -0.07 to -0.04 ** | -0.07 | -0.08 to -0.06 ** | -0.08 | -0.09 to -0.07 ** |
| Registration in primary care → need | 0.02 | 0.01 to 0.04 ** | 0.05 | 0.04 to 0.06 ** | 0.05 | 0.04 to 0.06 ** |
| Education → interval since last dental visit | -0.17 | -0.19 to -0.16 ** | -0.29 | -0.30 to -0.28 ** | -0.30 | -0.30 to -0.29 ** |
| Education → need | -0.15 | -0.17 to -0.13 ** | -0.30 | -0.31 to -0.29 ** | -0.31 | -0.32 to -0.30 ** |
| Education → social network | 0.48 | 0.41 to 0.54 ** | 0.70 | 0.68 to 0.72 ** | 0.69 | 0.67 to 0.71 ** |
| Education → enabling financing | 0.54 | 0.51 to 0.56 ** | 0.67 | 0.66 to 0.69 ** | 0.69 | 0.68 to 0.70 ** |
| Education → enabling organisation | 0.25 | 0.23 to 0.28 ** | 0.43 | 0.43 to 0.44 ** | 0.45 | 0.44 to 0.46 ** |
| Education → registration in primary care | -0.02 | -0.04 to 0.00 ** | -0.19 | -0.19 to -0.18 ** | -0.19 | -0.20 to -0.18 ** |
| Sex → interval since last dental visit | -0.07 | -0.09 to -0.05 ** | -0.07 | -0.08 to -0.06 ** | -0.07 | -0.08 to -0.06 ** |
| Sex → need | 0.12 | 0.11 to 0.14 ** | 0.07 | 0.07 to 0.08 ** | 0.08 | 0.07 to 0.09 ** |
| Sex → social network | -0.59 | -0.63 to -0.54 ** | -0.39 | -0.41 to -0.37 ** | -0.43 | -0.45 to -0.41 ** |
| Sex → enabling financing | -0.02 | -0.04 to 0.01 n.s. | -0.09 | -0.10 to -0.08 ** | -0.07 | -0.08 to -0.05 ** |
| Sex → enabling organisation | -0.02 | -0.03 to 0.00 n.s. | -0.01 | -0.02 to 0.00 n.s. | -0.01 | -0.01 to 0.00 n.s. |
| Sex → registration in primary care | 0.04 | 0.02 to 0.06 ** | 0.04 | 0.03 to 0.05 ** | 0.04 | 0.03 to 0.04 ** |
| Age → interval since last dental visit | 0.26 | 0.24 to 0.28 ** | 0.17 | 0.16 to 0.18 ** | 0.18 | 0.17 to 0.19 ** |
| Age → social network | -0.43 | -0.51 to -0.36 ** | -0.06 | -0.09 to -0.02 ** | -0.12 | -0.16 to -0.09 ** |
| Age → need | 0.78 | 0.76 to 0.80 ** | 0.68 | 0.67 to 0.69 ** | 0.68 | 0.67 to 0.69 ** |
| Age → enabling financing | 0.27 | 0.23 to 0.31 ** | 0.31 | 0.29 to 0.24 ** | 0.29 | 0.28 to 0.30 ** |
| Age → enabling organisation | 0.16 | 0.14 to 0.18 ** | 0.23 | 0.22 to 0.24 ** | 0.23 | 0.22 to 0.23 ** |
| Age → registration in primary care | 0.00 | -0.02 to 0.02 n.s. | -0.04 | -0.05 to -0.04 ** | -0.05 | -0.06 to -0.04 ** |

β = bootstrapped standardised estimate

n.s. non-significant

* P<0.05

** P<0.01
